# Supplementary material
Source: PubMed Central journal article supplement (PMC9529809)
Supplement: NIHMS1820639-supplement-Supplemental_Publication_Material.pdf [file NIHMS1820639-supplement-Supplemental_Publication_Material.pdf]

**Table S1: Patient Event Characteristics**

| Characteristics                                | Stroke                                    | Stroke Mimics                | Neurotoxicity Related to Chemotherapy | Tumor Progression | Seizure/PRES | Infection | P value <sup>a</sup> |
|------------------------------------------------|-------------------------------------------|------------------------------|---------------------------------------|-------------------|--------------|-----------|----------------------|
| Stroke Alert Activations                       | 14                                        | 23                           | 8                                     | 6                 | 6            | 3         |                      |
| Median Age at Activation (years)               | 14 [7, 16]                                | 13 [9, 17]                   | 16                                    | 10.5              | 15.5         | 1.7       | 0.76                 |
| Males                                          | 13 (93%)                                  | 15 (65%)                     | 3                                     | 5                 | 4            | 3         | 0.11                 |
| Primary Oncologic Diagnosis                    | 5 (36%)                                   | 14 (61%)                     | 8                                     | 6                 | 0            | 0         | 0.14                 |
| History of Transplant                          | 8 (57%)                                   | 5 (22%)                      | 0                                     | 0                 | 4            | 1         | <b>0.03</b>          |
| Liver Transplant                               | 3                                         | 0                            | 0                                     | 0                 | 0            | 0         |                      |
| Lung Transplant                                | 0                                         | 3                            | 0                                     | 0                 | 3            | 0         |                      |
| Cardiac Transplant                             | 4                                         | 1                            | 0                                     | 0                 | 1            | 0         |                      |
| Kidney Transplant                              | 1                                         | 1                            | 0                                     | 0                 | 0            | 1         |                      |
| Primary immunodeficiency                       | 1 (7%)                                    | 4 (17%)                      | 0                                     | 0                 | 2            | 2         | 0.38                 |
| Steroids/Immune-modulating therapy             | 11 (79%)                                  | 20 (87%)                     | 7                                     | 5                 | 5            | 2         | 0.65                 |
| Diffusion Positive on MRI                      | 12/13 <sup>b</sup> patients who had a MRI | 14/23 patients who had a MRI | 6                                     | 3                 | 2            | 3         | 0.15                 |
| Median NIHSS                                   | 17 [13, 30]                               | 7 [3,14]                     | 4.5                                   | 8.5               | 4.5          | 24        | <b>0.002</b>         |
| Hemiparesis                                    | 12                                        | 13                           | 5                                     | 4                 | 2            | 3         | 0.08                 |
| Facial Droop                                   | 6                                         | 8                            | 2                                     | 3                 | 0            | 2         | 0.62                 |
| Dysarthria                                     | 1                                         | 5                            | 1                                     | 2                 | 1            | 1         | 0.38                 |
| Aphasia                                        | 3                                         | 4                            | 1                                     | 2                 | 1            | 0         | 1.00                 |
| Headache                                       | 3                                         | 4                            | 1                                     | 0                 | 2            | 1         | 1.00                 |
| Altered mental status                          | 11                                        | 5                            | 3                                     | 2                 | 0            | 0         | <b>0.002</b>         |
| Persistent Neurologic Symptoms at follow up, n | 11/13 <sup>c</sup> patients               | 10/21 <sup>c</sup> patients  | 3                                     | 4                 | 1            | 2         | <b>0.048</b>         |
| Death Directly Related to Alert                | 4                                         | 5                            | 0                                     | 4                 | 1            | 0         | 0.58                 |

<sup>a</sup> Comparison of strokes and stroke mimics with Fisher/chi-square for categorical variables; Wilcoxon/Mann-Whitney U for continuous variables

<sup>b</sup> One patient with a large hemorrhagic stroke did not get a MRI at the time of his alert, because he was clinically unstable; one patient had a left middle cerebral artery syndrome and had a delayed MRI due to the presence of pacemaker wires. When his MRI was obtained 3 days later, it was without diffusion changes.

SUPPLEMENTAL MATERIAL

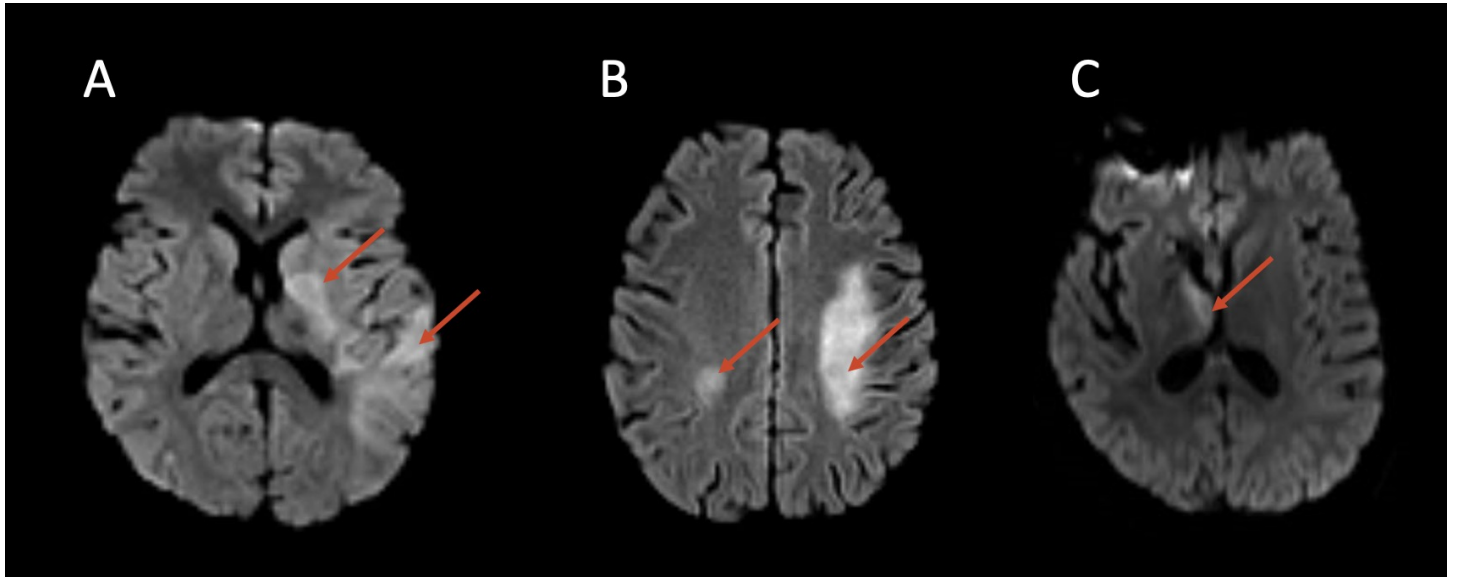

**Figure S1:** Patterns of diffusion restriction (red arrows) observed in hyperacute magnetic resonance imaging for code strokes. A: Wedge-shaped diffusion restriction in left hemisphere. Final diagnosis: Left middle cerebral artery cardioembolic stroke. B: Asymmetric deep white matter diffusion restriction. Final diagnosis: Methotrexate toxicity. C: Diffusion restriction in the thalamus. Final diagnosis: Tumor progression.
